# Supplementary figures and images for: Green Biogenic of Silver Nanoparticles Using Polyphenolic Extract of Olive Leaf Wastes with Focus on Their Anticancer and Antimicrobial Activities
Source: MDPI journal article supplement (doi:10.3390/plants12061410), 2023-03-22

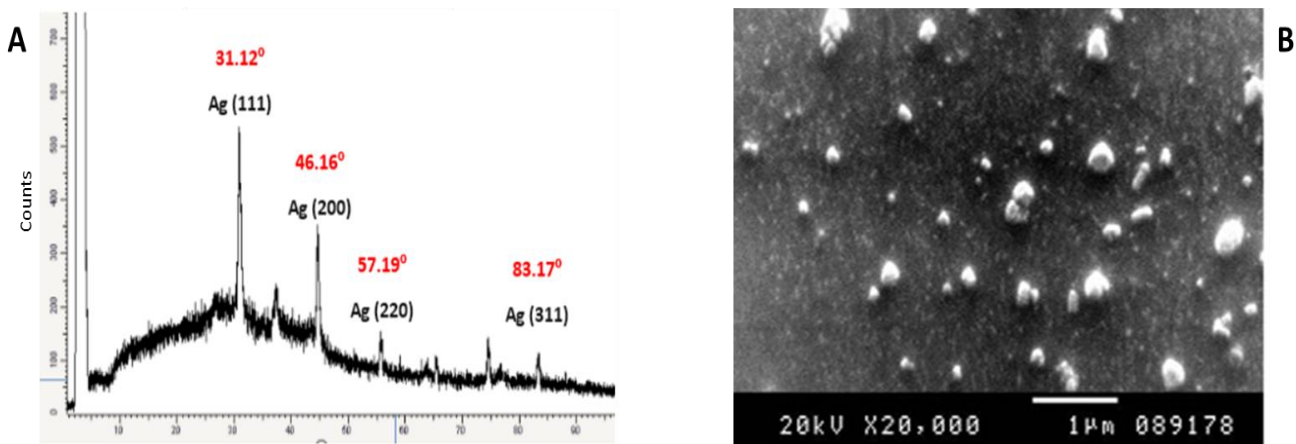

Figure S1. (A) XRD spectrum, (B) SEM micrographs of OLAgnPs biosynthesized by OLWE

Supplement: s1 [file s1]
